# Supplementary material for: Outcomes in Thread Lift for Facial Rejuvenation: a Study Performed with Happy Lift™ Revitalizing
Source: PubMed Central journal article supplement — Dermatol Ther (Heidelb). 2014 Jan 17;4(1):103–14. doi: 10.1007/s13555-014-0041-6 (PMC4065274; doi:10.1007/s13555-014-0041-6), 2014-01-17
Supplement: 13555_2014_41_MOESM1_ESM.pdf [file 13555_2014_41_MOESM1_ESM.pdf]

- Barbed suture lifting is a minimally invasive surgical technique for facial rejuvenation. This study examined the efficacy and associated risks with this procedure, using a new synthetic, monofilament suspension thread named “Happy Lift™ Revitalizing”.
- All the patients had average ageing signs and required a lifting of modest degree. A total of 37 thread lifts were performed over a 24-month period.
- In the majority of patients (89%) , the results obtained were considered satisfactory. The incidence of complications was low. Only 6% of the patients had slight post-operation asymmetry that was easily corrected.
- Minor complications experienced by patients included small ecchymosis (62%), mild erythema (40%), small haemorrhage (25%), mild transitory aesthesia (6%) and mild post-operation tumefaction (40%). Histopathological and ecographic analyses were performed on the treated skin of selected patients, demonstrating that the lifting effect is guaranteed and fortified by the cutaneous reaction that appears along the length of the thread.
- Threadlift with “Happy Lift™ Revitalizing” is a safe procedure associated with minor complications, when performed to cohorts of patients requiring a lifting of modest degree .

This summary slide represents the opinions of the authors. For a full list of acknowledgments and conflicts of interest for all authors of this article, please see the full text online. Copyright © The Authors **2014**. Creative Commons Attribution Noncommercial License (CC BY-NC).
